# Supplementary material for: A comparison of fragmenting lead-based and lead-free bullets for aerial shooting of wild pigs
Source: PLoS One. 2021 Mar 11;16(3):e0247785. doi: 10.1371/journal.pone.0247785 (PMC7951828; doi:10.1371/journal.pone.0247785)
Supplement: S1 Data — (CSV) [file pone.0247785.s001.csv]

bullet	fps	mps	Ek	mass
Pb	2955	900.684	3416.849782	8.423857
Pb	2963	903.1224	3435.375535	8.423857
Pb	2968	904.6464	3446.979565	8.423857
Pb	2898	883.3104	3286.303564	8.423857
Pb	2876	876.6048	3236.597385	8.423857
Pb	2925	891.54	3347.824292	8.423857
Pb	2886	879.6528	3259.144147	8.423857
Pb	2908	886.3584	3309.022498	8.423857
Pb	2919	889.7112	3334.103715	8.423857
Pb	2904	885.1392	3299.925533	8.423857
Cu	3109	947.6232	3345.852933	7.4518735
Cu	3117	950.0616	3363.094015	7.4518735
Cu	3110	947.928	3348.005645	7.4518735
Cu	3127	953.1096	3384.707674	7.4518735
Cu	3092	942.4416	3309.362749	7.4518735
Cu	3117	950.0616	3363.094015	7.4518735
Cu	3105	946.404	3337.249008	7.4518735
Cu	3098	944.2704	3322.218791	7.4518735
Cu	3095	943.356	3315.787655	7.4518735
Cu	3119	950.6712	3367.411208	7.4518735
